# Supplementary material for: A hybrid broadband metalens operating at ultraviolet frequencies
Source: PubMed Central journal article supplement (PMC7840775; doi:10.1038/s41598-021-81956-4), 2021-01-27
Supplement: 41598_2021_81956_MOESM1_ESM.pdf [file 41598_2021_81956_MOESM1_ESM.pdf]

## **SUPPLEMENTARY INFORMATION**

# **A hybrid broadband metalens operating at ultraviolet frequencies**

Farhan Ali and Serap Aksu

### The optical constants:

The optical constants of glass and MgO are taken from Palik, Stephens et al. respectively<sup>33, 36</sup>. We calculate the refractive index of MgO down to 200 nm using a dispersion relation<sup>37</sup>. Thus, the refractive index used for MgO is not fixed and wavelength dependent. After calculating the refractive index within 200-400nm, we import the data to Lumerical. Below we show the dependance of MgO refractive index on wavelength, which is used for simulations.

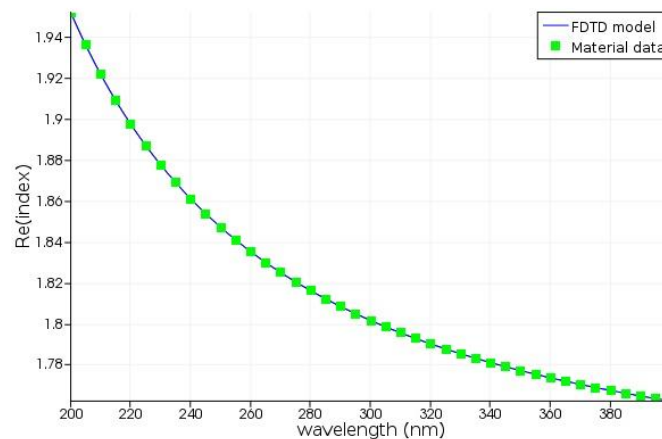

**Figure S1.** Refractive index- wavelength relation for MgO within related frequency regime. This data is used in FDTD.

### Further investigation on metalens under broadband source vs monochromatic source:

In order to understand the focusing properties under broadband light illumination, we simulated the metalenses designed at 300nm ( $\lambda_d = 300\text{nm}$ , mentioned on Page 7), and illuminate with different monochromatic light sources within 200-400nm frequency range. As stated in Table S1, the focal length is nearly linearly dependant on incident wavelength. As wavelength moves towards 200nm, the simulated focal length increases, displaying a negative dispersion (Figure S2. The negative dispersion is also observed in references 25 and 42). At 200nm, the simulated focal length is found as  $\sim 7.73\mu\text{m}$ , which is close to the focal length obtained with 200-400 nm broadband illumination ( $\sim 7.76\mu\text{m}$ ). If the broadband illumination had the same effect as the sum of each monochromatic light, we would not observe an intensity distribution as in Figure 5a. This result implies that a non-linear optical effect could be going on, which worth a further, separate study to explain.

| $\lambda_{\text{incident}} \text{ (nm)}$ | Simulated focal length $f \text{ (}\mu\text{m)}$ |
|------------------------------------------|--------------------------------------------------|
| 200                                      | 7.73                                             |
| 220                                      | 6.92                                             |
| 250                                      | 5.88                                             |
| 280                                      | 5.09                                             |
| 300                                      | 4.63                                             |
| 320                                      | 4.22                                             |
| 350                                      | 3.71                                             |
| 380                                      | 3.30                                             |
| 400                                      | 3.06                                             |

**Table S1.** Variation of focal length for the metalens designed for 300nm, when illuminated with various monochromatic light within the range of 200-400nm.

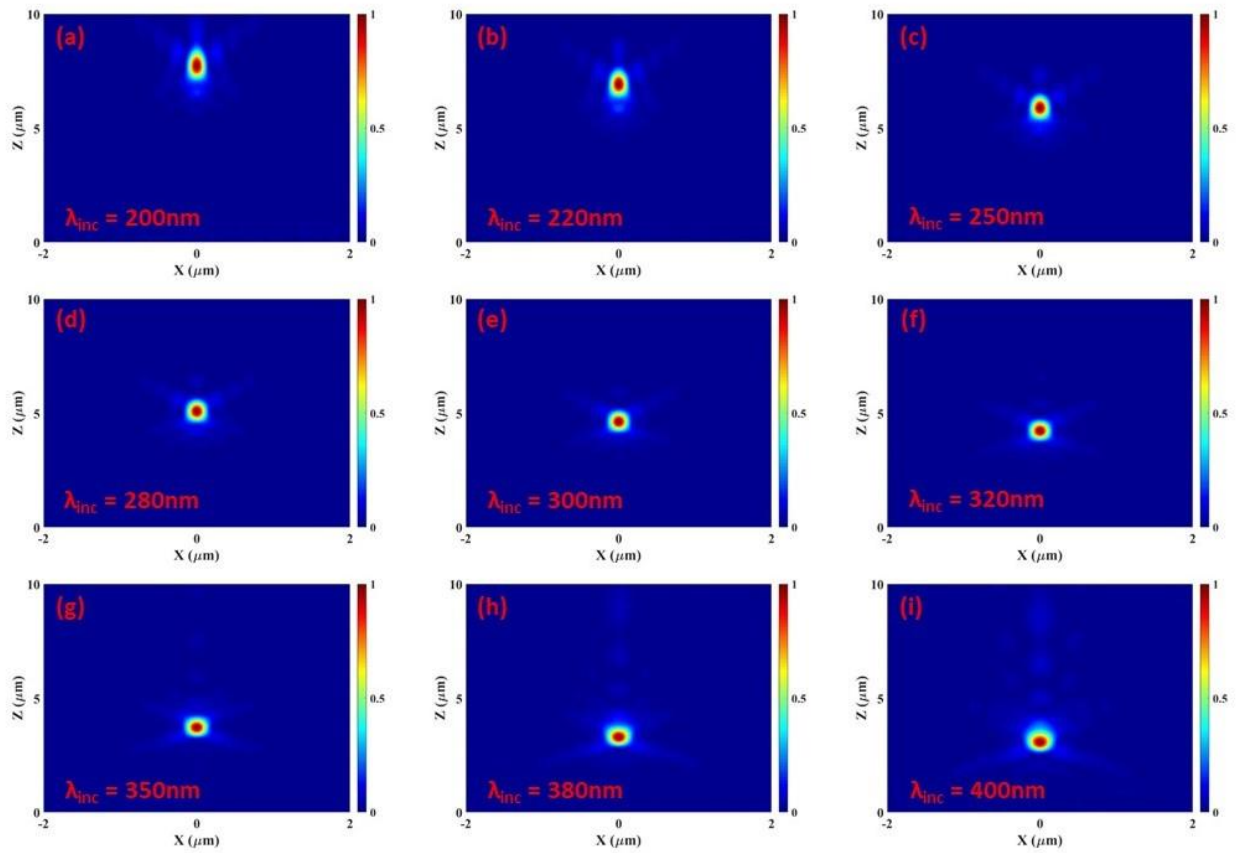

**Figure S2.** Simulated focal spots (x-z profiles at  $y=0$ ) for the metalens designed for 300nm, when illuminated with various monochromatic light within the range of 200-400nm.

To further investigate the effect of illumination wavelength, we tested the same metalens design ( $\lambda_d = 300\text{nm}$ ) under different broadband illumination ranges as shown in Table 2 and Figure S3. When the 275-325 nm broadband light is illuminated on the same metalens (instead of 200-400 nm), we obtain a focal length of  $5.19 \mu\text{m}$ , closer to the focal length obtained under monochromatic 300 nm illumination ( $4.63 \mu\text{m}$ ). As we further increase the range to 250-350 nm, we see an increase on focal length ( $5.88 \mu\text{m}$ ). When we change the broadband illumination towards higher wavelengths (250-400nm) we observe a similar focal length ( $5.88 \mu\text{m}$ ) with

250-350 nm illumination. However, when we change the broadband illumination towards lower wavelengths (225-375nm and 200-250 nm) we observe a significant increase on focal length. This result implies that the focal length for the proposed metalens under broadband illumination (200-400nm) is similar to the focal lengths obtained with monochromatic lower wavelengths (200nm). Hence the focal length under broadband illumination is decided by lower wavelengths.

| $\lambda_{\text{incident}} \text{ (nm)}$ | Simulated focal length $f \text{ (}\mu\text{m)}$ |
|------------------------------------------|--------------------------------------------------|
| 275-325                                  | 5.19                                             |
| 250-350                                  | 5.88                                             |
| 250-400                                  | 5.88                                             |
| 225-375                                  | 6.70                                             |
| 200-250                                  | 7.73                                             |

**Table S2.** Variation of focal length for the metalens designed for 300nm, when illuminated with various broadband light within the range of 200-400nm.

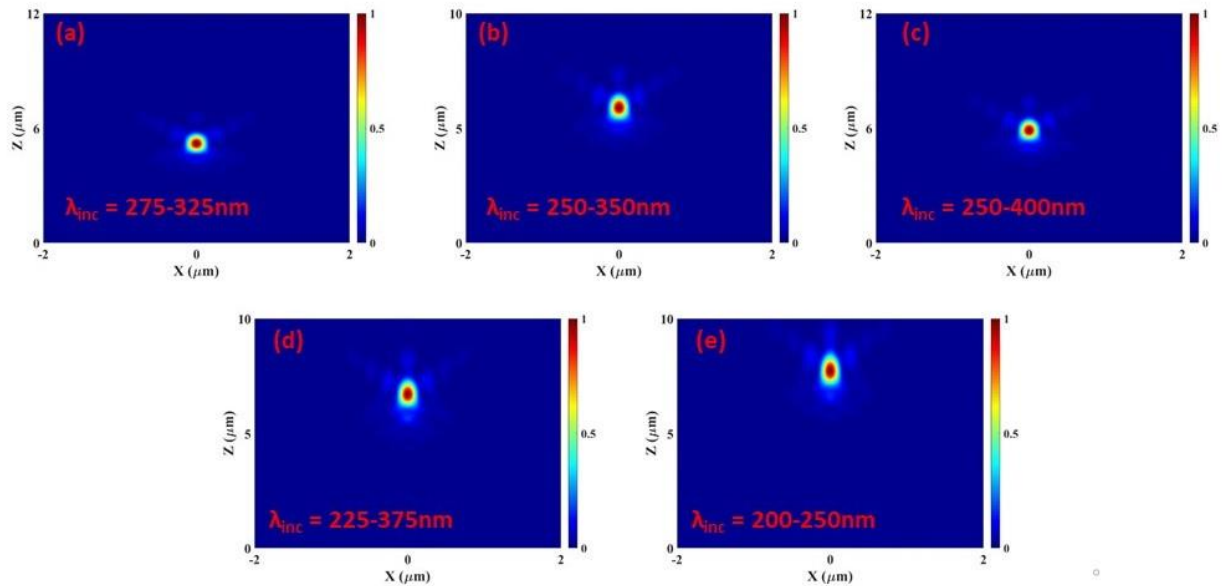

**Figure S3.** Simulated focal spots (x-z profiles at  $y=0$ ) for the metalens designed for 300nm, when illuminated with various broadband light within the range of 200-400nm.

Moreover, in order to confirm the focal length increase under broadband illumination compared to monochromatic illumination, we additionally investigate the metalens designed for 380 nm ( $\lambda_d = 380\text{nm}$ ) illuminated by 350-410 nm broadband light, centering 380 nm wavelength. The focal length under 380 nm monochromatic light is found as 4.56  $\mu\text{m}$ , where under 350-410 nm broadband illumination the focal length is found as 5.01  $\mu\text{m}$  (Table S3). Therefore, similar to the previous case, the broadband illumination results in a higher focal length compared to monochromatic illumination due to the presence of lower ( $<380 \text{ nm}$ ) illumination wavelengths.

| $\lambda_d$ (nm) | $\lambda_{\text{incident}}$ (nm) | Simulated focal length f ( $\mu\text{m}$ ) |
|------------------|----------------------------------|--------------------------------------------|
| 380              | 350-410                          | 5.01                                       |

**Table S3.** Simulated focal length for the metalens designed for 380nm, when illuminated with broadband light source 350-410nm, centring 380 nm wavelength.
